# Supplementary material for: TFEB-mediated increase in peripheral lysosomes regulates store-operated calcium entry
Source: PubMed Central journal article supplement (PMC5233950; doi:10.1038/srep40797), 2017-01-13

**TFEB-mediated increase in peripheral lysosomes regulates  
Store Operated Calcium Entry**

Luigi Sbano, Massimo Bonora, Saverio Marchi, Federica Baldassari, Diego L. Medina,  
Andrea Ballabio, Carlotta Giorgi and Paolo Pinton

## **Supplementary information**

### **Methods**

#### **Immunoblotting**

For immunoblotting, cells were scraped into ice-cold, phosphate buffered saline (PBS) and lysed in a buffer containing 50 mM Tris HCl pH 7.4, 150 mM NaCl, 1% Triton X-100, 0.2% SDS, protease and phosphatase inhibitor cocktail. After 30 min of incubation on ice and centrifugation at 2,500 rpm at 4°C for 5 min, proteins were quantified by the Lowry method, and 10 µg of each sample was loaded onto a Novex NuPage Bis-Tris 4–12% precast gel (Life Technologies). The separated proteins were transferred to nitrocellulose membranes. After incubation with TBS–Tween-20 (0.05%) supplemented with 5% non-fat powdered milk for 1 h to saturate unspecific binding sites, the membranes were incubated overnight with primary antibodies. Detection was achieved using appropriate horseradish peroxidase-labeled secondary antibodies (Santa Cruz Biotechnology), followed by biochemiluminescence (ThermoScientific) using an ImageQuant LAS4000 (GE Healthcare).

#### **Antibodies**

The following primary antibodies were used for Western blotting: rabbit anti-FLAG [F7425] (1:2,000) and mouse anti-β-actin [A1978] (1:10,000) from Sigma-Aldrich; rabbit anti-GAPDH [#2118] (1:5,000) and rabbit anti-TFEB [#4240] (1:1000) from Cell Signaling; rabbit anti-STIM1 [sc-68897] (1:1,000) and rabbit anti-ORAI1 [sc-68895] (1:1,000) from Santa Cruz Biotechnology.

#### **Analysis of lysosomal morphology**

HeLa cells expressing a lysosomal-targeted variant of GFP (LAMP1-GFP) were imaged using an IX-81 automated epifluorescence microscope (Olympus) equipped with a 60× oil-immersion objective (N.A. 1.35, from Olympus) and an ORCA-R2 CCD camera (Hamamatsu Photonics K.K.).

Selected cells were followed over time, and z-stacks were subjected to digital deconvolution using a Wiener deconvolution filter and a theoretical point-spread function provided by Xcellence software (Olympus). GFP-positive objects were quantified using BITPLANE Imaris 4.

### **Cell treatment in the starvation experiment**

For starvation experiments, cells were cultured in the following media for 6 h: (normal) DMEM high glucose supplemented with 10% FBS; (starvation) HBSS with  $\text{Ca}^{2+}$  and  $\text{Mg}^{2+}$  supplemented with 10 mM HEPES. During starvation, cells were treated with CsA (10  $\mu\text{M}$ ) or DMSO (vehicle) to inhibit the phosphatase calcineurin.

### **Immunofluorescence**

Cells, transfected or treated as described, were washed with PBS and fixed with 4% formaldehyde for 10 min at room temperature. After washing three times with PBS, the cells were permeabilized with 0.1% Triton X-100 in PBS (PBST) at room temperature for 10 min and blocked with PBST containing 5% BSA at room temperature for 1 h. The cells were incubated with an anti-FLAG primary antibody (Sigma-Aldrich, dilution 1:100) in PBST containing 5% BSA overnight at 4°C, washed three times with PBS, and then incubated with appropriate isotype-matched, AlexaFluor 488-conjugated secondary antibodies (Life Technologies, dilution 1:1000) at room temperature for 1 h. Digital images were acquired using a confocal microscope (Zeiss LSM510) with a 63  $\times$  1.4 NA Plan-Apochromat oil-immersion objective and analyzed using Fiji open-source software.

## Figure legends

### **Fig. S1. Transient overexpression of TFEB increased the lysosomal network in HeLa cells.**

(A) Representative immunoblot images of TFEB protein abundance in HeLa cells transfected for 48 h with the empty vector (pCDNA3) or plasmid encoding TFEB 3xflag (TFEB). (B) Representative images of lysosomal morphology and quantification of lysosomal number in HeLa cells co-transfected for 48 h with LAMP1-GFP (green) and pCDNA3 (Control) or TFEB 3xflag (TFEB) (pCDNA3 n = 27, TFEB n = 28). Data are presented as the means  $\pm$  SEM, \*\*p<0.01.

### **Fig. S2. TFEB overexpression modulated capacitative Ca<sup>2+</sup> entry at low extracellular Ca<sup>2+</sup> concentrations.**

Cytosolic Ca<sup>2+</sup> measurements of capacitative Ca<sup>2+</sup> entry measured by cytosolic aequorin in HeLa cells transfected with pCDNA3 or TFEB 3xflag (TFEB). After intracellular Ca<sup>2+</sup> store depletion, 1 mM Ca<sup>2+</sup> was perfused in solution (n = 12 for each experiment). Data are presented as the means  $\pm$  SEM. a.u.c. = area under the curve.

### **Fig. S3. Downregulation of TFEB decreased the lysosomal network and lysosomal localization to the PM, thereby increasing capacitative Ca<sup>2+</sup> entry in HeLa cells.**

(A) Representative immunoblot images of TFEB protein abundance in HeLa cells transfected for 72 h with control siRNA (siRNA-CTR) or siRNA for TFEB (siRNA-TFEB). (B) Representative images of lysosomal morphology and quantification of lysosomal number in HeLa cells transfected for 48 h with LAMP1-GFP (green) and silenced for 72 h with control siRNA (siRNA-CTR) or siRNA for TFEB (siRNA-TFEB) (n = 34 for each condition). (C) Representative images and quantification of lysosomal distance to the plasma membrane normalized on the cellular area in HeLa cells transfected for 48 h with LAMP1-GFP (green) and silenced for 72 h with siRNA control (siRNA-CTR) or siRNA for TFEB (siRNA-TFEB); the plasma membrane is stained with FM4-64fx

dye (red) (siRNA-CTR n = 17, siRNA-TFEB n = 11). (D) Cytosolic Ca<sup>2+</sup> measurements of capacitative Ca<sup>2+</sup> entry measured by cytosolic aequorin in HeLa cells transfected with control siRNA (siRNA-CTR) or siRNA for TFEB (siRNA-TFEB). After intracellular Ca<sup>2+</sup> store depletion, 50 μM Ca<sup>2+</sup> was perfused in solution (siRNA-CTR n = 23, siRNA-TFEB n = 16). Data are presented as the means ± SEM; \*p<0.05, \*\*\*p<0.001. a.u.c. = area under the curve.

**Fig. S4. TFEB overexpression did not alter the basal ER Ca<sup>2+</sup> concentration.**

(A) Representation of phases of FRET experiments in HeLa cells transfected with the ER-targeted Cameleon (D1ER) probe to directly measure [Ca<sup>2+</sup>]<sub>ER</sub>. Ca<sup>2+</sup> was depleted from the ER with agonist (histamine 100 μM) and subsequently stimulated with 50 μM Ca<sup>2+</sup> to induce ER Ca<sup>2+</sup> re-uptake. (B) The ER Ca<sup>2+</sup> concentration measured with ER-targeted aequorin in control (pcDNA3) or overexpressing TFEB 3xflag (TFEB) HeLa cells in the presence of a low extracellular Ca<sup>2+</sup> concentration (CaCl<sub>2</sub> 50 μM). Administration of histamine (100 μM) resulted in comparable ER emptying under both conditions (n = 10 for each condition). Data are presented as the means ± SEM.

**Fig. S5. Transient TFEB downregulation increased Ca<sup>2+</sup> re-uptake by the endoplasmic reticulum.**

Ca<sup>2+</sup> re-uptake rate measurement using the ER-targeted Cameleon (D1ER) probe in HeLa cells transfected for 72 h with control siRNA (siRNA-CTR) or siRNA for TFEB (siRNA-TFEB) during washout of agonist (histamine 100 μM) (pcDNA3 n = 41, TFEB n = 33). Data are presented as the means ± SEM; \*\*p<0.01.

**Fig. S6. TFEB overexpression did not influence STIM1 and ORAI1 expression or punctae formation.**

(A) Representative immunoblot images of protein expression levels of STIM1 and ORAI1 in HeLa cells transfected for 48 h with a plasmid expressing pcDNA3 (Control) or TFEB 3xflag (TFEB). (B) ORAI1-YFP representative images and ORAI1 clusters quantification of HeLa cells transfected with a plasmid expressing pcDNA3 (Control) or TFEB 3xflag (TFEB) before and after treatment with thapsigargin (200 nM) for 15 min in a Ca<sup>2+</sup>-free medium (KRB/EGTA) (pcDNA3 n = 16, TFEB n = 13). (C) STIM1-YFP representative images and STIM1 clusters quantification of HeLa cells transfected with a plasmid expressing pcDNA3 (Control) or TFEB 3xflag (TFEB) before and after treatment with thapsigargin (200 nM) for 15 min in a Ca<sup>2+</sup>-free medium (KRB/EGTA) (pcDNA3 n = 13, TFEB n = 14). Data are presented as the means ± SEM.

**Fig. S7. Vac-1 treatment reduced lysosomal Ca<sup>2+</sup> in TFEB-overexpressing cells.**

(A) Lysosomal Ca<sup>2+</sup> uptake measured using lysosomal aequorin in HeLa cells transfected with pcDNA3 (control) or with TFEB3xflag (TFEB) and pretreated with 10 μM Vac-1 or DMSO (vehicle) for 1 h. After intracellular Ca<sup>2+</sup> store depletion, the cells were perfused with 50 μM Ca<sup>2+</sup> (pcDNA3 + Vehicle n = 12, TFEB + Vehicle n = 12, pcDNA3 + Vac-1 n = 9, TFEB + Vac-1 n = 9). Data are presented as the means ± SEM; \*p<0.05, \*\*p<0.01.

**Fig. S8. The calcineurin/TFEB pathway modulates SOCE in TFEB-overexpressing HeLa cells.**

(A) Representative immunofluorescence images and quantification of TFEB nuclear localization (green) on the total TFEB fraction of HeLa cells overexpressing TFEB 3xflag under basal conditions (fed) or after 6 h of starvation (starved), treated with vehicle (DMSO) or CsA (10 μM). The cells were also transfected with the H2B-RFP construct to mark the nucleus (red) (Fed + Vehicle n = 29, Fed + CsA n = 28, Starved + Vehicle n = 18, Starved + CsA n = 45). (B) Cytosolic Ca<sup>2+</sup> measurements of capacitative Ca<sup>2+</sup> entry measured using cytosolic aequorin in HeLa cells transfected with pcDNA3 or TFEB 3xflag (TFEB) under basal conditions (fed) or after 6 h of

starvation (starved), treated with vehicle (DMSO) or CsA (10  $\mu$ M). After intracellular  $\text{Ca}^{2+}$  store depletion, 50  $\mu$ M  $\text{Ca}^{2+}$  was perfused in solution (for pcDNA3 samples: Fed + Vehicle n = 7, Fed + CsA n = 8, Starved + Vehicle n = 7, Starved + CsA n = 8; for TFEB samples: Fed + Vehicle n = 8, Fed + CsA n = 7, Starved + Vehicle n = 8, Starved + CsA n = 7). Data are presented as the means  $\pm$  SEM; \*\*p<0.01, \*\*\*\*p<0.0001. a.u.c. = area under the curve.

Supplementary Figure S1.

A

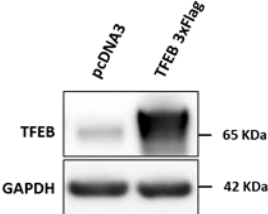

B

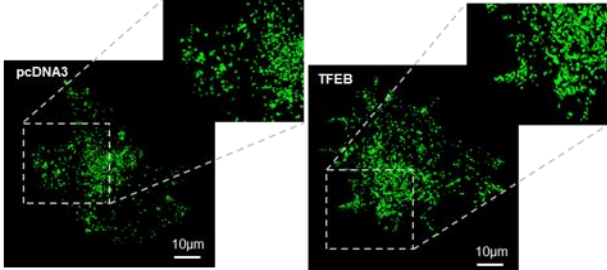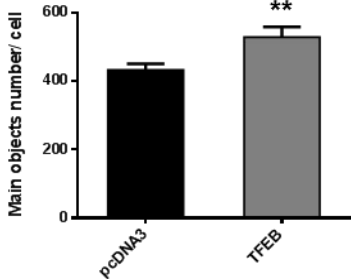



Supplementary Figure S2.

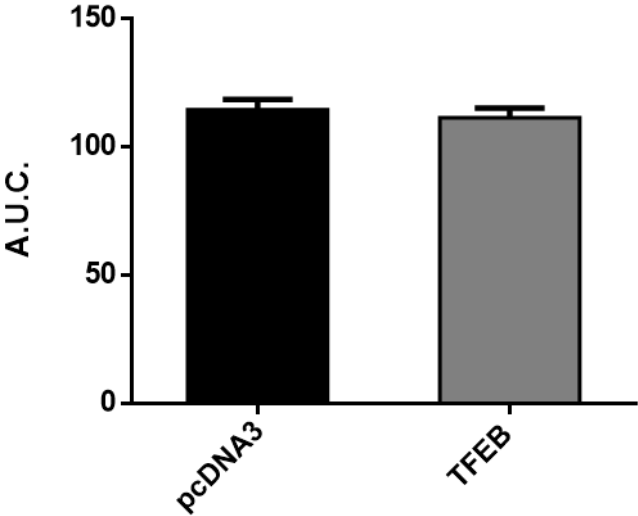

**Supplementary Figure S3.**

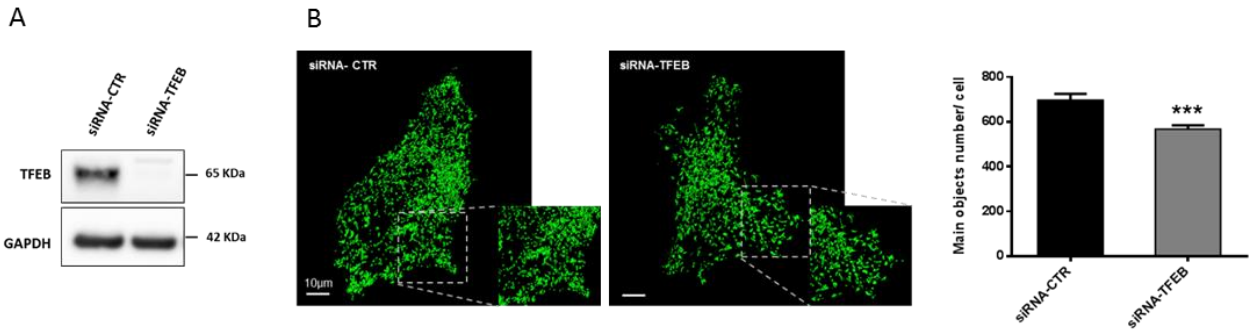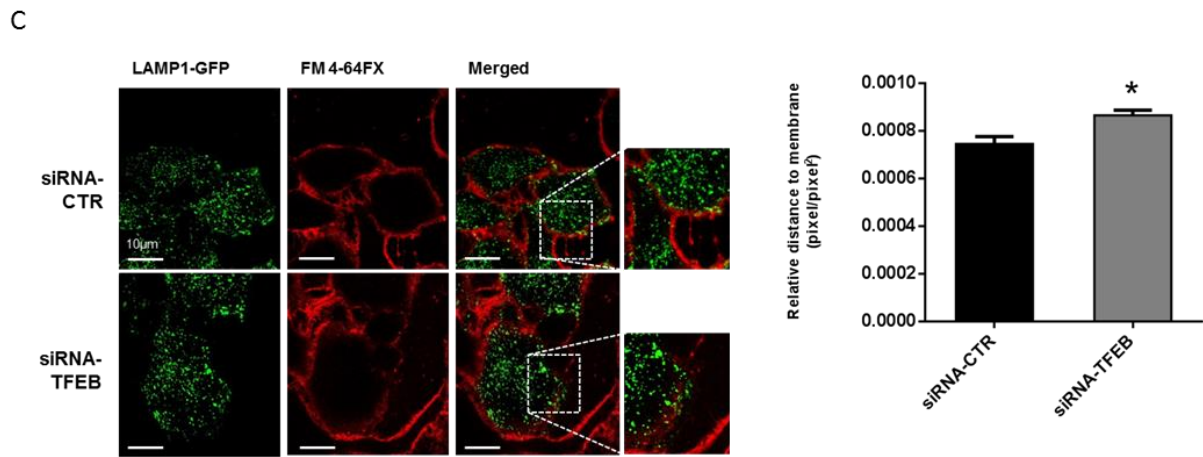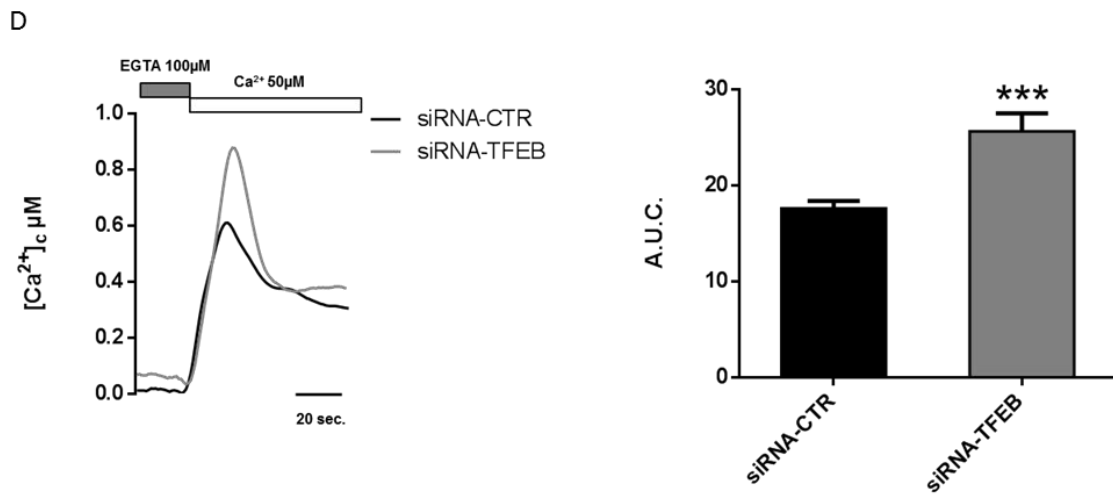

Supplementary Figure S4.

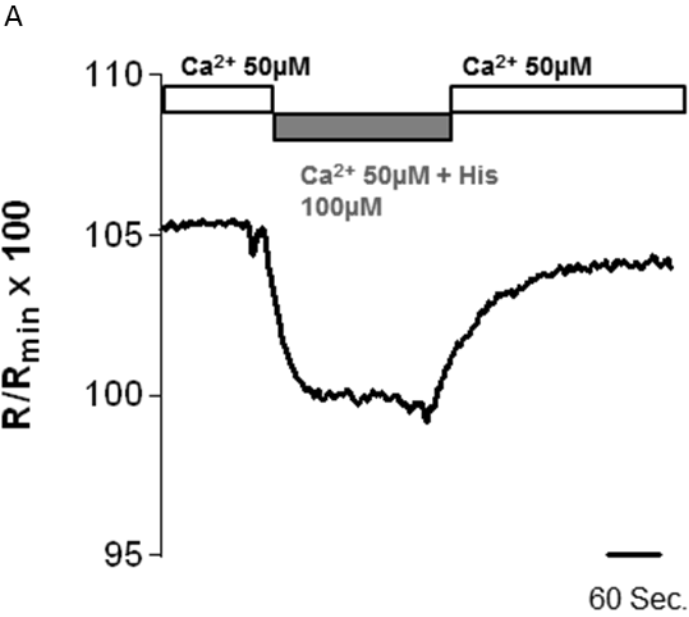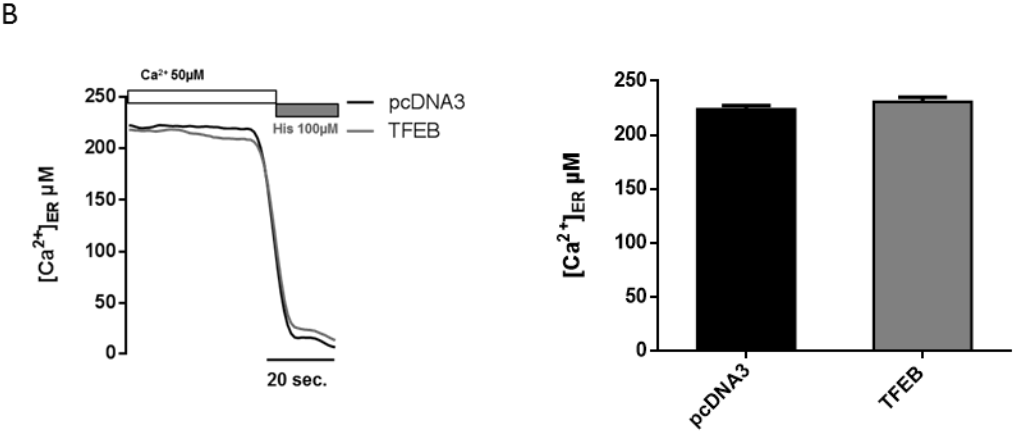

Supplementary Figure S5.

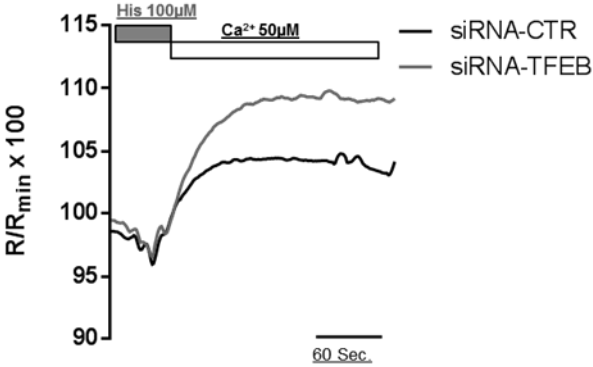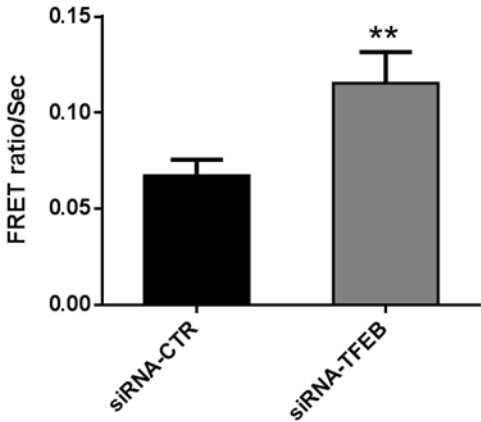

Supplementary Figure S6.

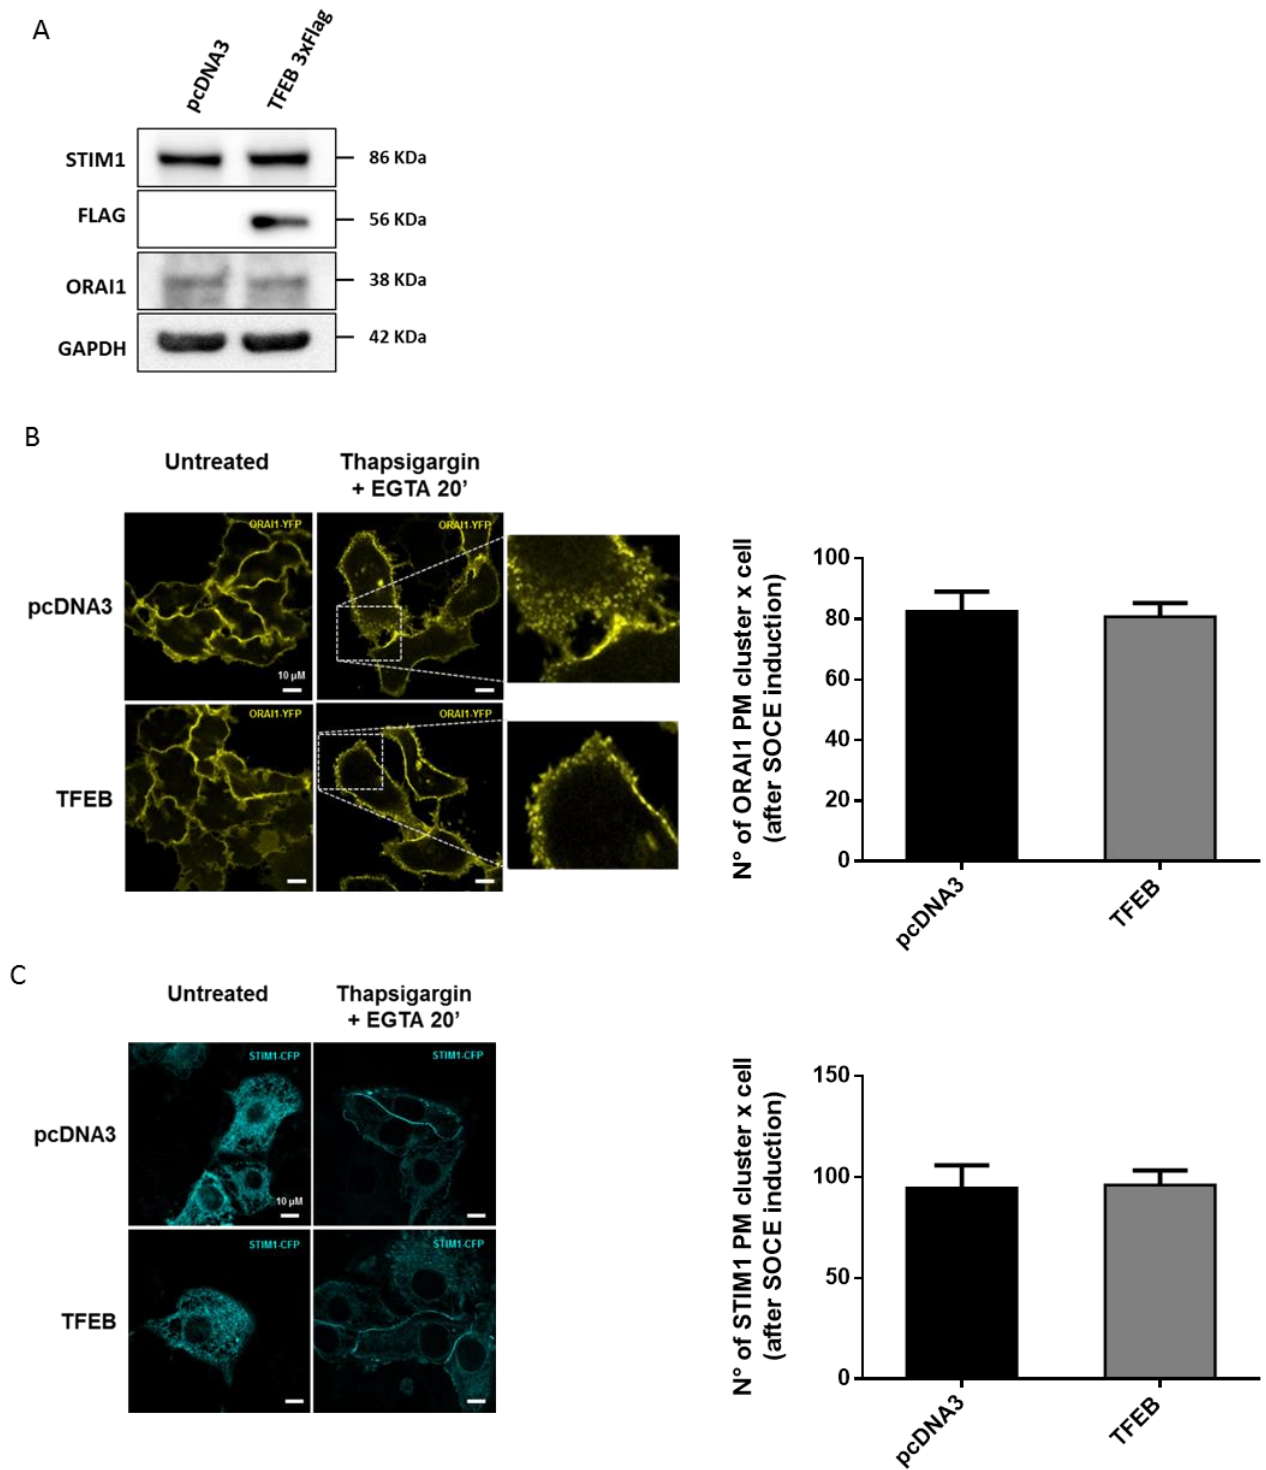

Supplementary Figure S7.

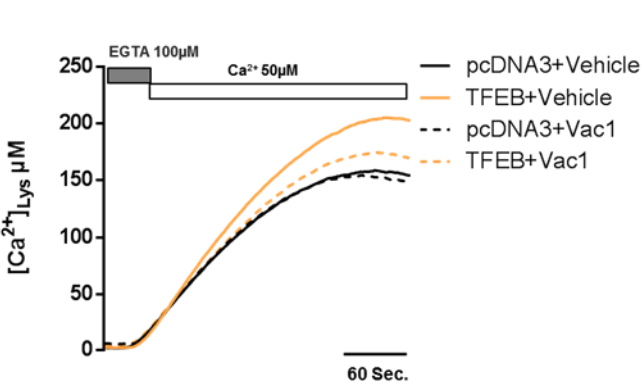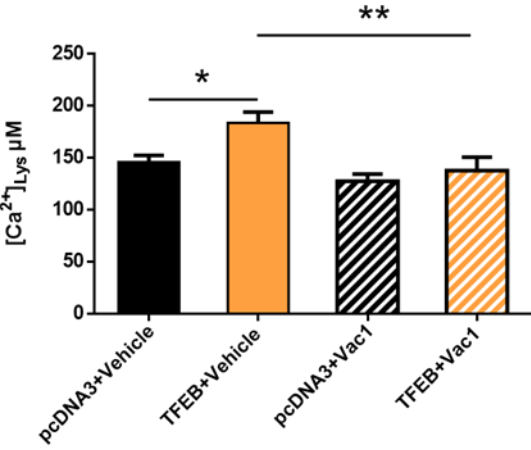

Supplementary Figure S8.

A

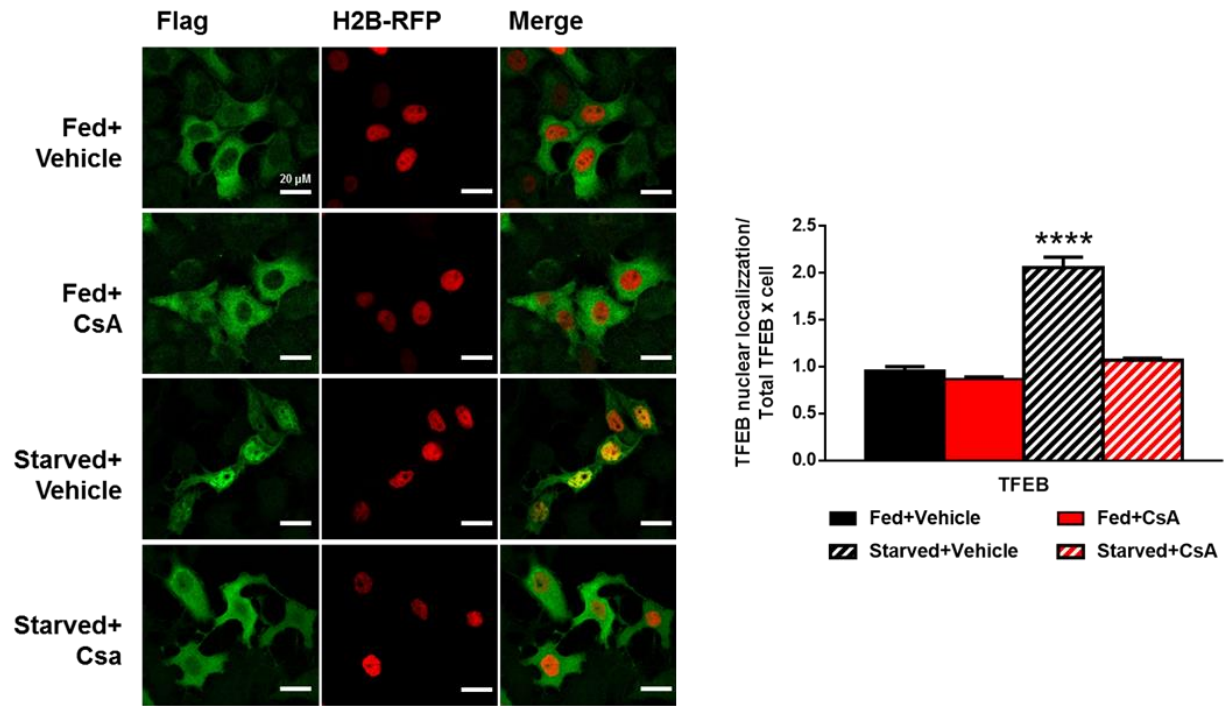

B

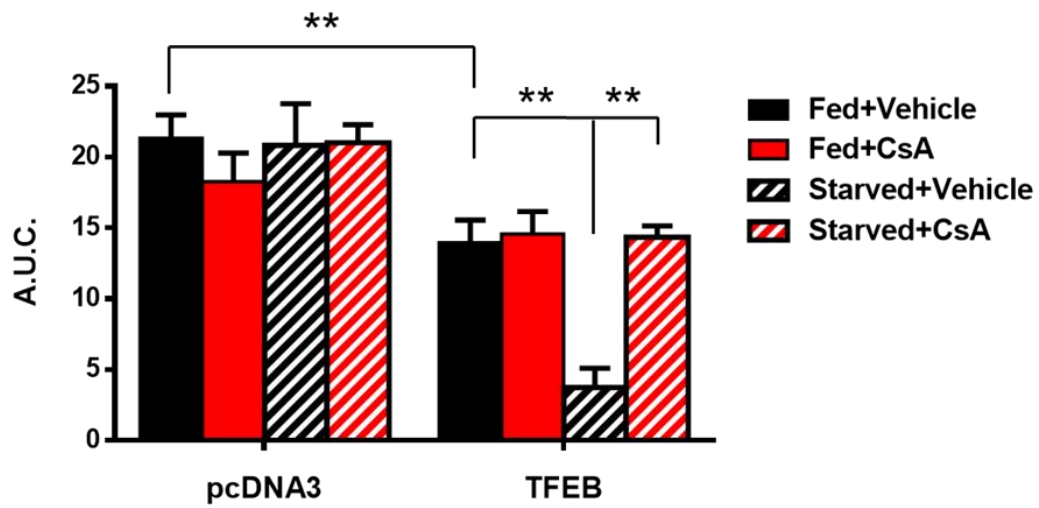

Supplement: srep40797-s1.pdf [file srep40797-s1.pdf]
